# Supplementary material for: Comprehensive transcriptome profiling of T-2 toxin-induced nephrotoxicity in mice
Source: Preprints.org preprint supplement (doi:10.20944/preprints202312.0727.v1), 2023-12-11
Supplement: Supplementary file 1 [file supplementary]

**Supplementary materials**

**Comprehensive transcriptome profiling of T-2 toxin-induced** **nephrotoxicity in mice**

Guoquan Wu1, Xuan Wu2,3, Yige Wu1, Yuping Wu4, Hui Li2*, Chongshan Dai1*

1 National Key Laboratory of Veterinary Public Health and Safety, College of Veterinary Medicine, China Agricultural University, Beijing 100193, China.

2 Beijing Key Laboratory of Diagnostic and Traceability Technologies for Food Poisoning, Beijing Center for Disease Prevention and Control, Beijing, China.

3 School of Public Health, Capital Medical University, Beijing 100069, China.

4 College of Life Science and Basic Medicine, Center for Biotechnology Research, Xinxiang University, Xinxiang, Henan, 453003, China.

Corresponding author. E-mail address: [lihui@bjcdc.org](mailto:lihui@bjcdc.org) (H.L.); [daichongshan@cau.edu.cn](mailto:daichongshan@cau.edu.cn) (C.S.D.).

**A**

**B**


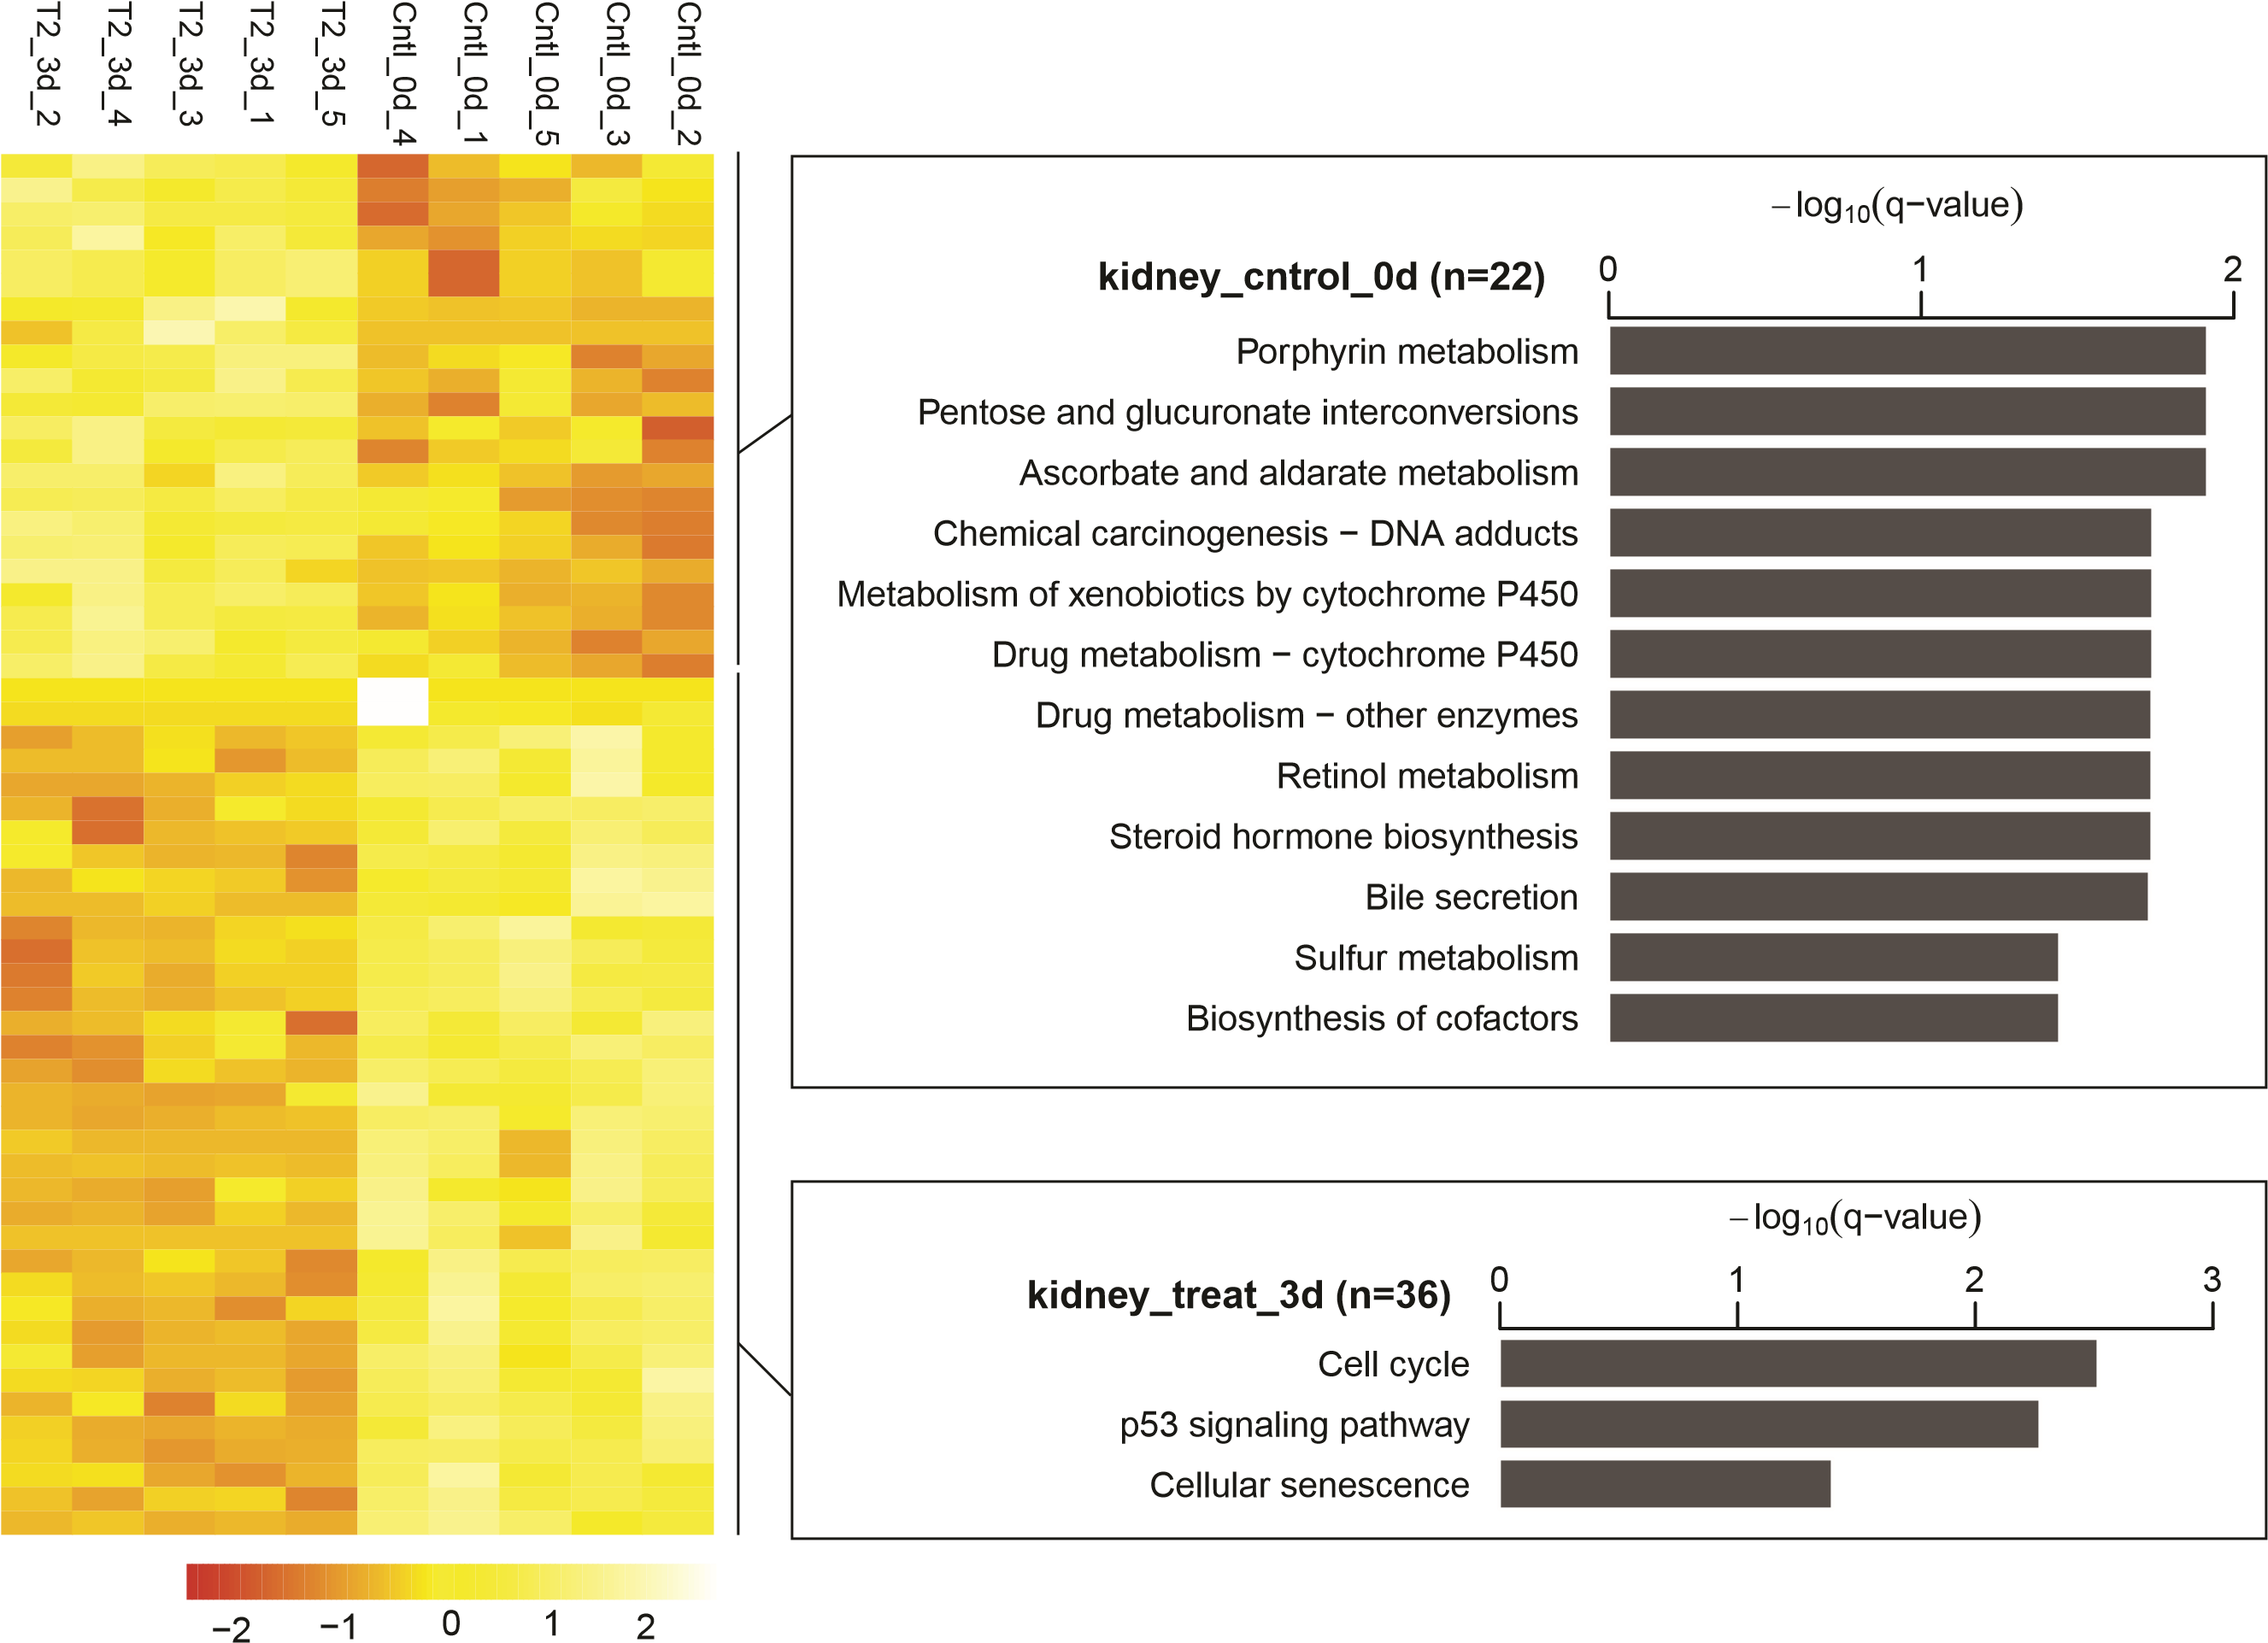


**Figure S1** Transcriptome profiling of mice kidney at 3 d after T-2 toxin exposure.

(A) GO function enrichment of DEGs in TG_3d group using Metascape software. The horizontal coordinate is the number of DEGs and the vertical coordinate is the categorical entry of GO.

(B) Heatmap representation of Z score-transformed FPKM of genes predominantly expressed in TG_3d group (left). The genes are ranked in descending order according to their FPKM. Overrepresented pathways are shown on the right. The top ranked pathways are shown with q-values.

Pentose and glucuronate interconversions

Ascorbate and aldarate metabolism

Drug metabolism − other enzymes

p53 signaling pathway

Cell cycle

Porphyrin metabolism

Rrm2

Cdk1

Ccnb1

Cdc20

Ccna2

Ugt2a2

Alas2

Ugt2b35

**Figure S2** Sankey diagram of KEGG pathway from overrepresentation analysis based on overlapping up-regulated and down-regulated genes in mice kidney at 3d after T-2 toxin exposure.

**A**


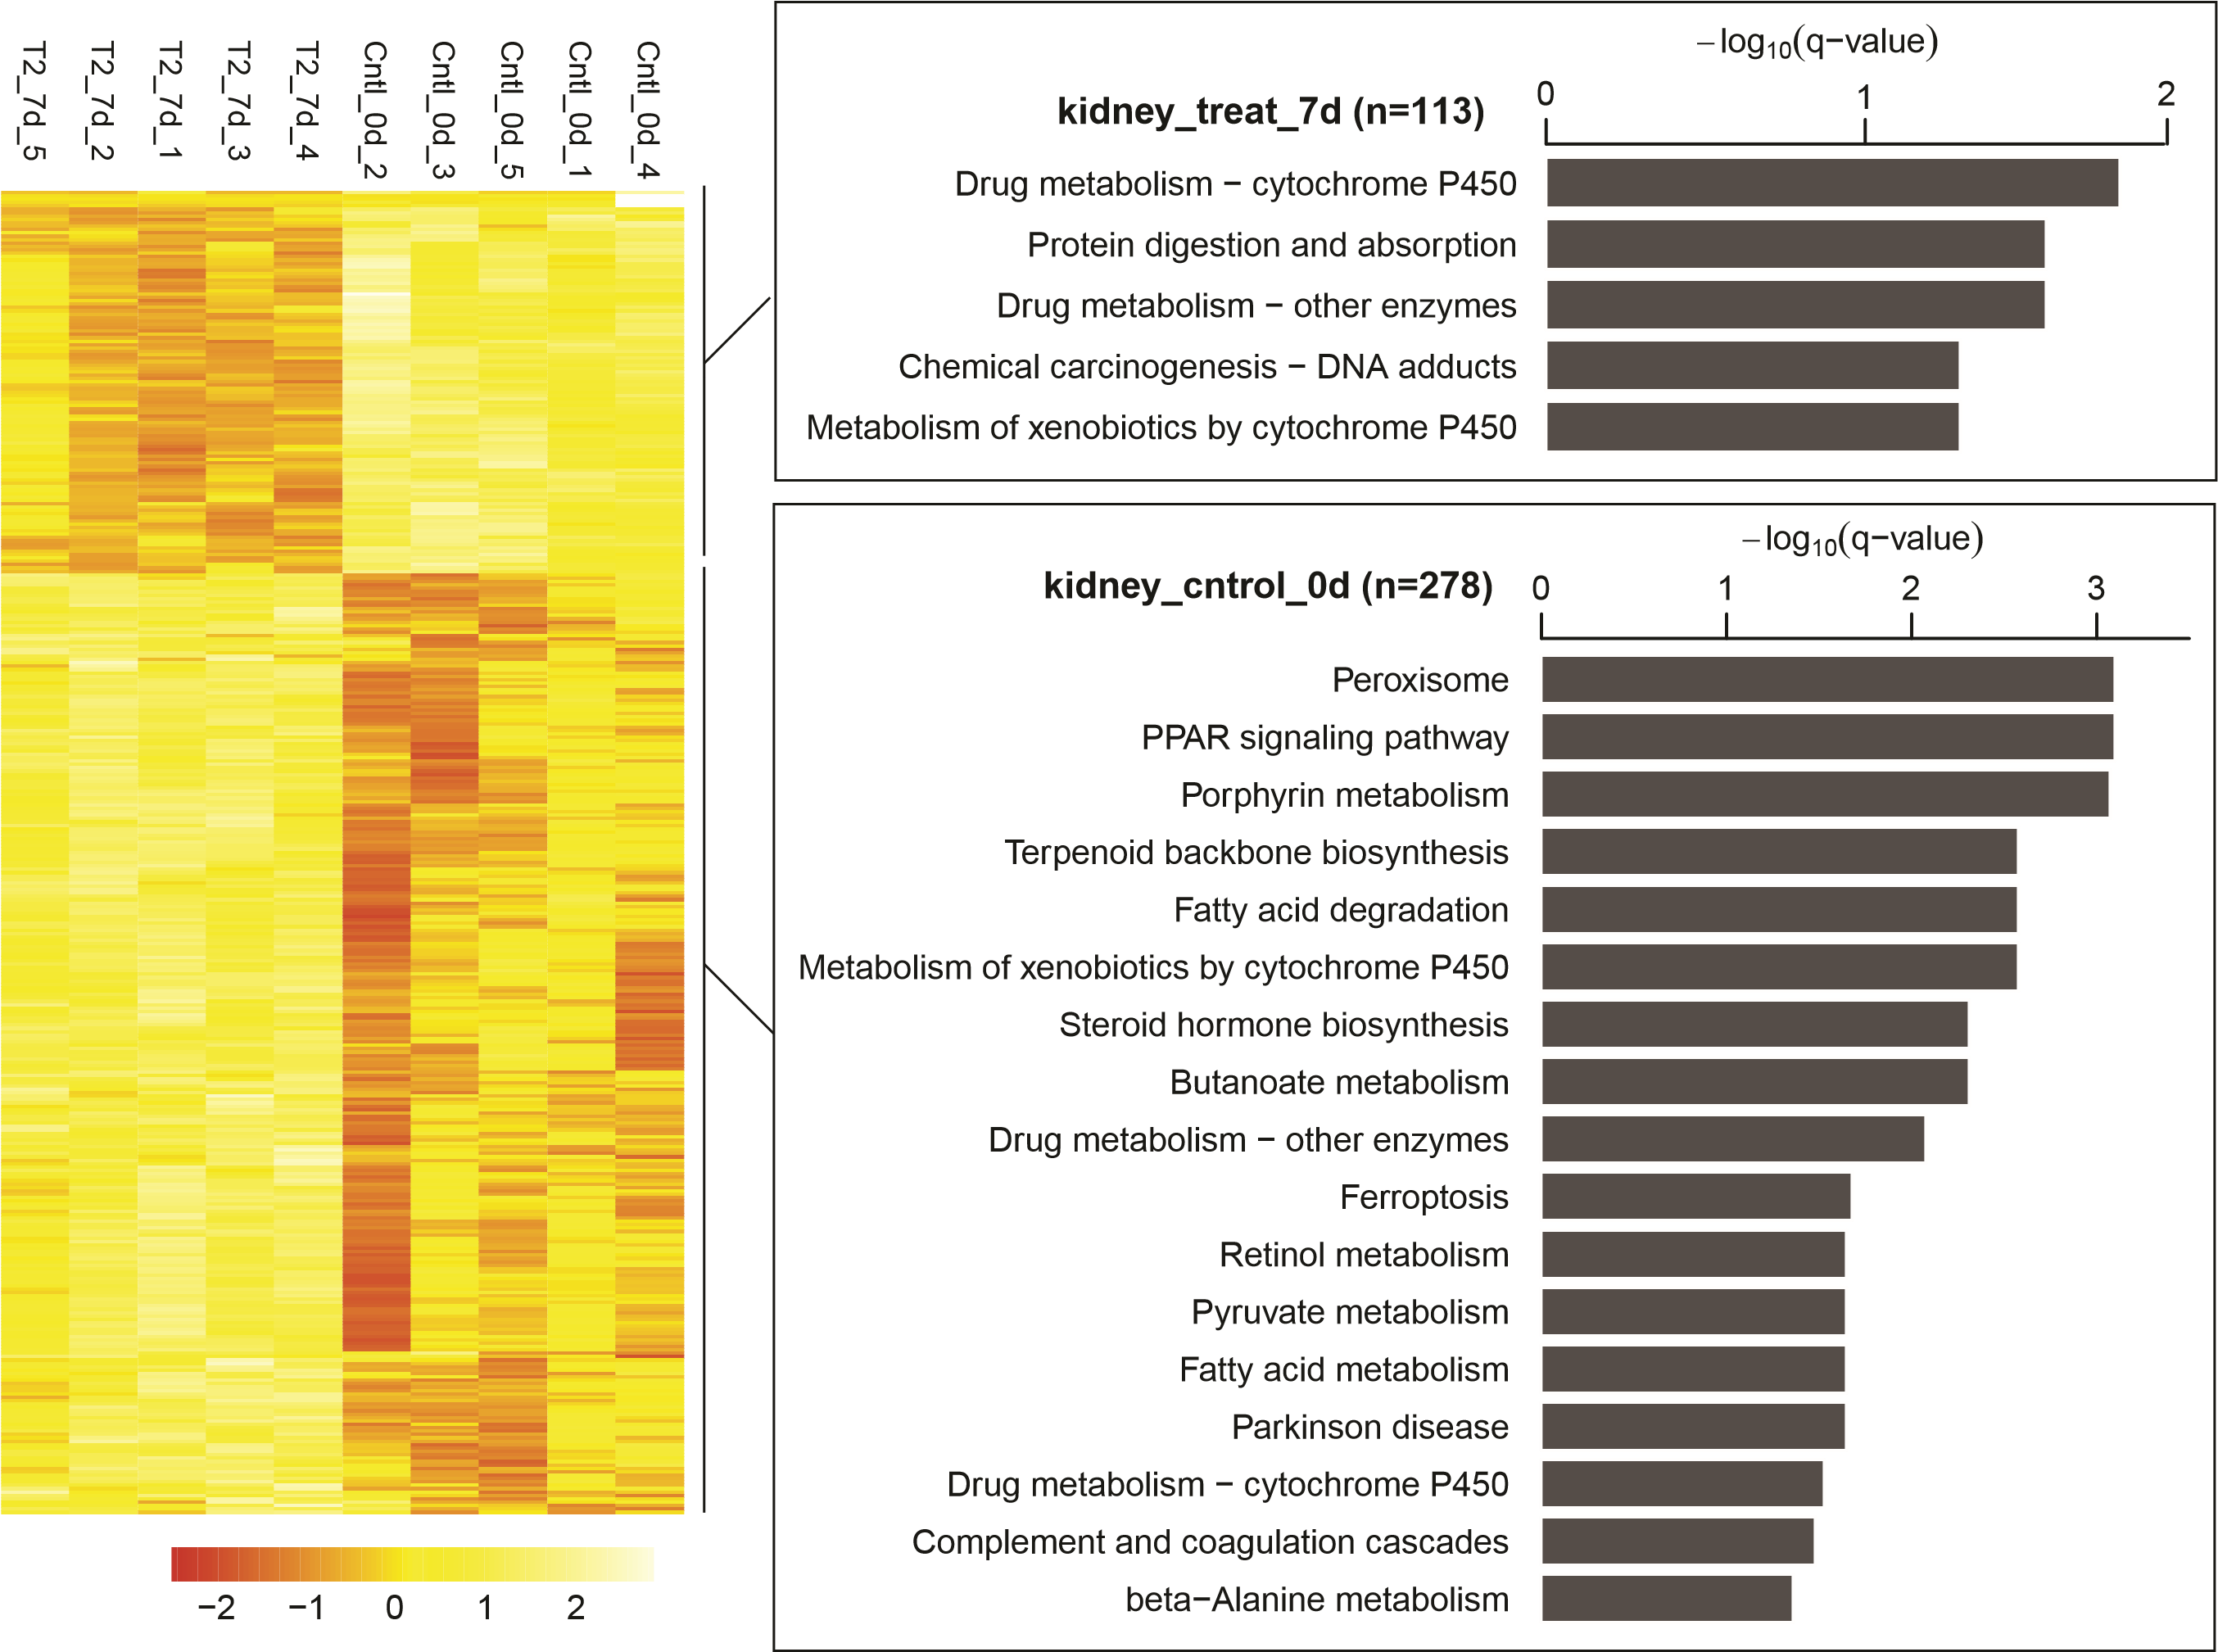


**B**

**Figure S3** Transcriptome profiling of mice kidney at 7 d after T-2 toxin exposure.

(A) GO function enrichment of DEGs in TG_7d group using Metascape software. The horizontal coordinate is the number of DEGs and the vertical coordinate is the categorical entry of GO.

(B) Heatmap representation of Z score-transformed FPKM of genes predominantly expressed in TG_7d group (left). The genes are ranked in descending order according to their FPKM. Overrepresented pathways are shown on the right. The top ranked pathways are shown with q-values.


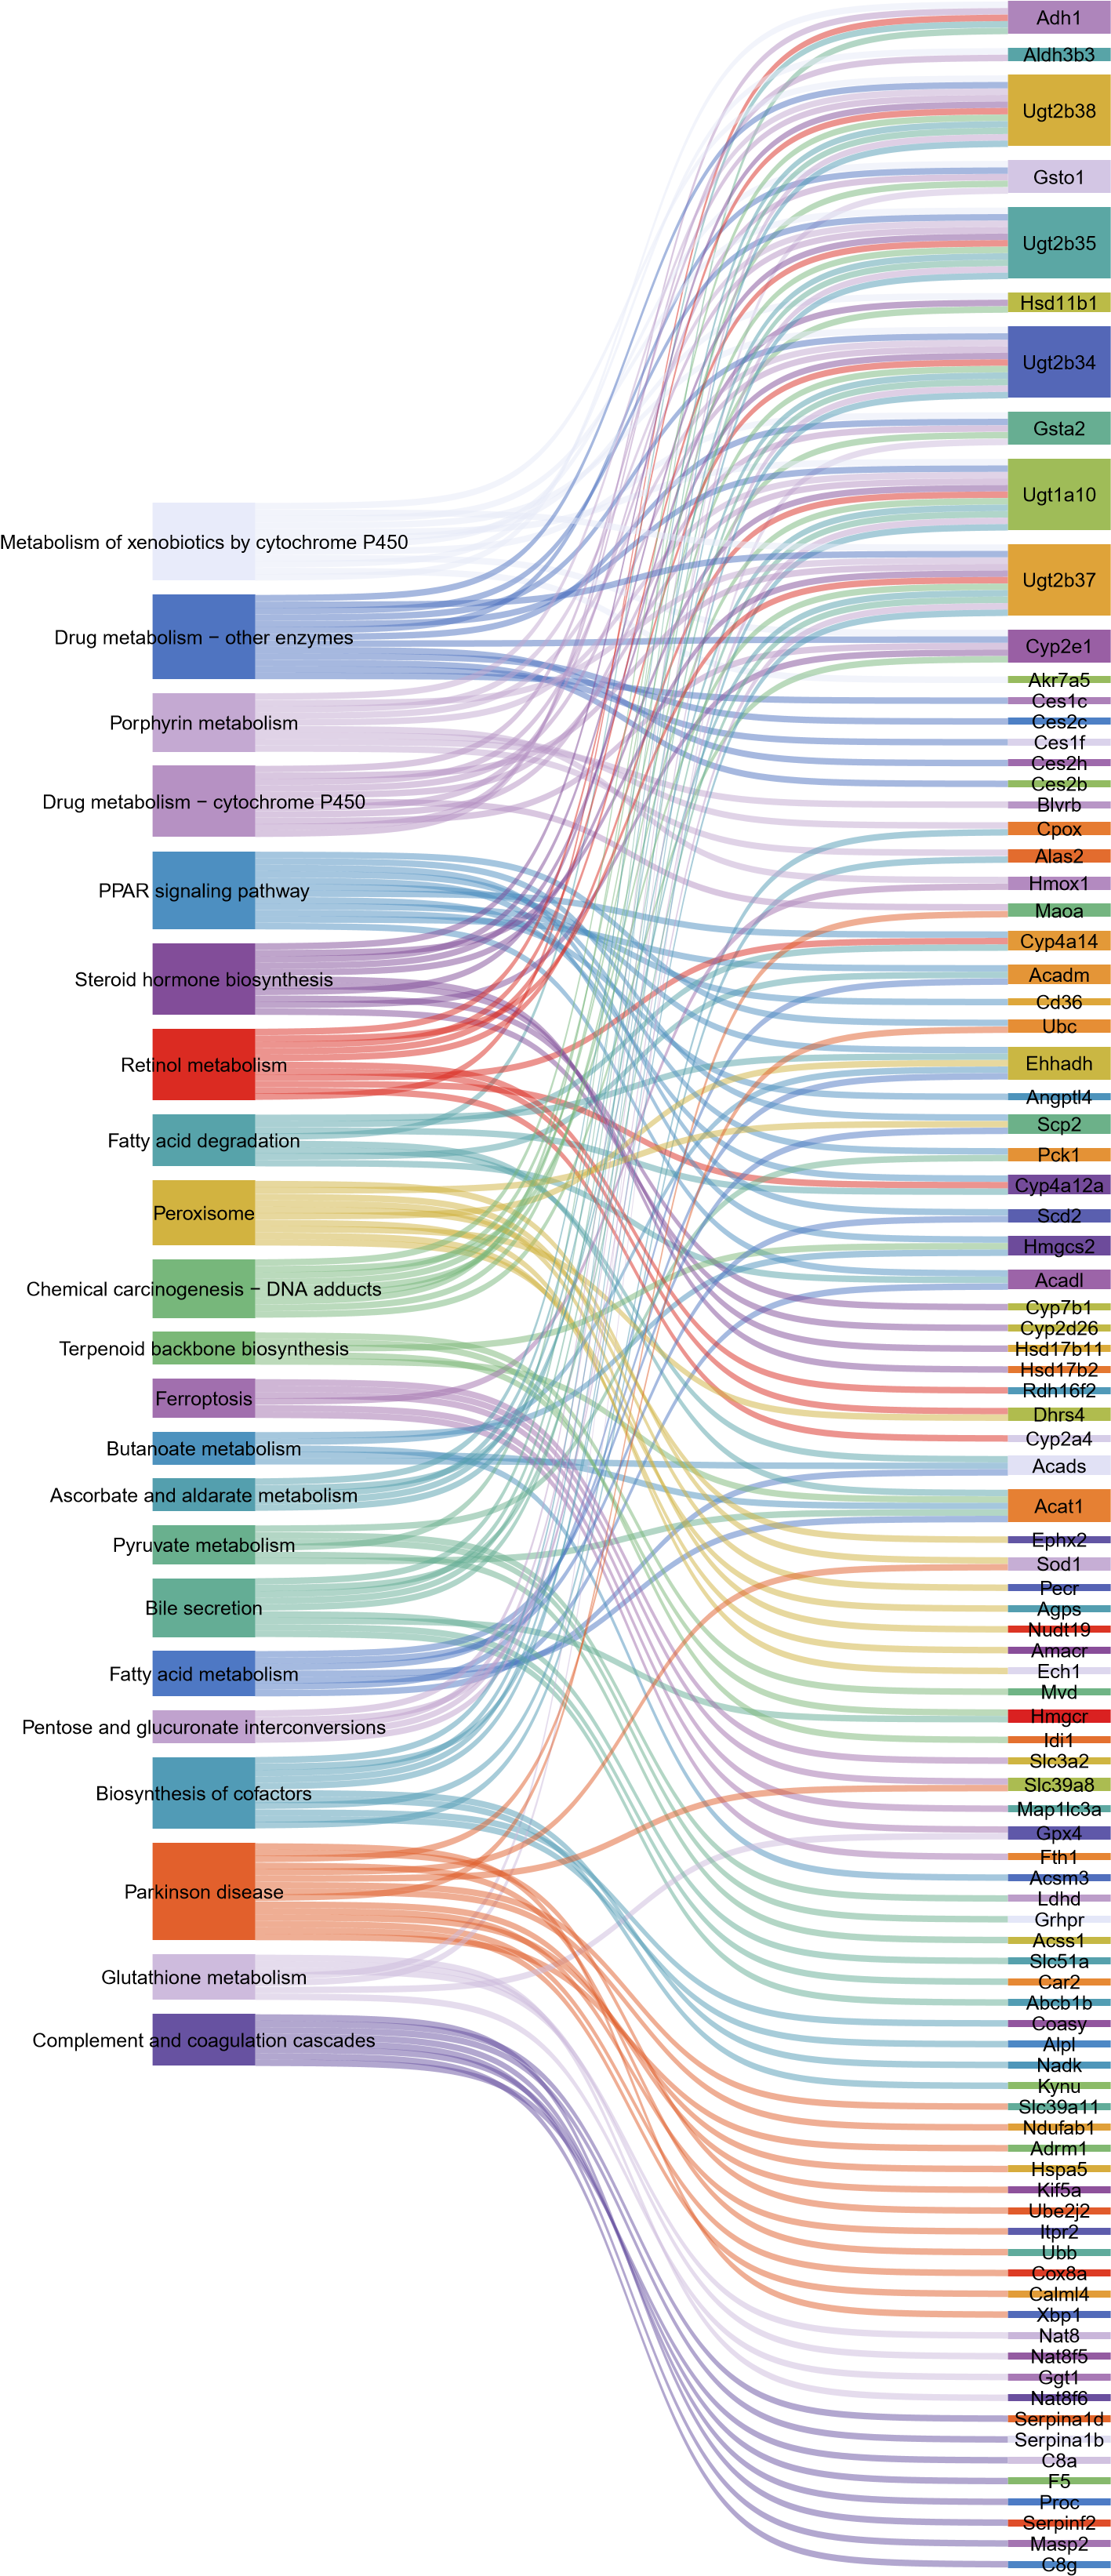


**Figure S4** Sankey diagram of KEGG pathway from overrepresentation analysis based on overlapping up-regulated and down-regulated genes in mice kidney at 7 d after T-2 toxin exposure.

**A**

**B**

**C**

**Figure S5** Enrichment analysis of transcriptional regulators involved in T-2 toxin exposure at 1 d (A), 3 d (B) and 7d (C).

Ugt2b38

Cyp4a14

Cyp2e1

Cyp2a4

Cdhr2

Rhov

Slc2a9

Pik3c2g

Myo10

Myh4

Hsp90ab1

Fkbp5

Rhoc

Arf4

Ank3

Ugt1a10

Cyp4a12a

Ugt2b35

b37

~~Ugt2~~

Ugt2b34

H2bc4

Ubc

Ubb

H2ac18

Echdc2

Nr1i2

Acads

Acadm

Acadl

Pecr

Nudt19

Ehhadh

Ech1

Dhrs4

Amacr

Ephx2

H2aj

**Table S1** Effects of T-2 toxin on the body weight of mice at different periods a.

| Treatment | 0d Weight (g) | 1d Weight (g) | 3d Weight (g) | 7d Weight (g) | Growth rate (0d vs 7d) |
| --- | --- | --- | --- | --- | --- |
| CG | 20.76±0.65 | 20.81±0.63 | 21.48±0.82 | 22.97±0.63 | 9.56%±0.05 |
| TG | 20.65±0.51 | 20.43±0.52 | 20.95±0.68*** | 22.12±0.68*** | 7.19%±0.04 |

a Data expressed as mean ± SD for each group.

****p* < 0.0001.

**Table S2** Reference genome alignment analysis using HISAT.

| Sample name | Total clean read | Total mapping genome ratio | Uniquely mapping genome ratio |
| --- | --- | --- | --- |
| CG_0d_1 | 23.86 | 96.75 | 74.45 |
| CG_0d_2 | 23.87 | 96.81 | 76.11 |
| CG_0d_3 | 23.86 | 96.79 | 73.26 |
| CG_0d_4 | 19.59 | 96.67 | 74.92 |
| CG_0d_5 | 23.84 | 96.15 | 75.68 |
| CG_1d_1 | 23.84 | 96.38 | 75.32 |
| CG_1d_2 | 23.84 | 96.55 | 74.08 |
| CG_1d_3 | 23.83 | 96.36 | 74.25 |
| CG_1d_4 | 23.83 | 96.34 | 76.01 |
| CG_1d_5 | 23.84 | 96.35 | 75.12 |
| CG_3d_1 | 23.84 | 96.32 | 75.87 |
| CG_3d_2 | 23.84 | 96.44 | 75.50 |
| CG_3d_3 | 23.84 | 96.48 | 74.86 |
| CG_3d_4 | 23.80 | 96.31 | 75.97 |
| CG_3d_5 | 23.85 | 96.39 | 76.08 |
| TG_1d_1 | 23.84 | 96.33 | 75.81 |
| TG_1d _2 | 23.79 | 96.09 | 75.27 |
| TG_1d _3 | 23.78 | 96.04 | 75.44 |
| TG_1d _4 | 23.84 | 96.33 | 74.17 |
| TG_1d _5 | 23.85 | 96.50 | 75.80 |
| TG_3d_1 | 23.80 | 96.23 | 75.58 |
| TG_3d _2 | 23.81 | 96.51 | 75.47 |
| TG_3d _3 | 23.79 | 96.25 | 75.90 |
| TG_3d _4 | 23.78 | 96.29 | 76.07 |
| TG_3d _5 | 23.80 | 96.27 | 75.45 |
| TG_7d_1 | 23.78 | 96.25 | 74.36 |
| TG_7d _2 | 23.79 | 96.17 | 75.44 |
| TG_7d _3 | 23.80 | 96.27 | 74.75 |
| TG_7d _4 | 23.75 | 96.42 | 73.68 |
| TG_7d _5 | 23.83 | 96.09 | 75.33 |
